# Supplementary material
Source: publisher figshare collection journal article supplement (https://sage.figshare.com/ndownloader/files/15130283)
Supplement: Supplementary file 1 [file 15130283]

Reviewer 2 v1

This is a well-organized and succinct review article on the research and treatments of smoke inhalation-induced acute lung injury (SI-ALI). This flow of this review is easy to follow and the structure is very logic. This review should be a valuable reference for investigators in the field.

I have a minor suggestion:

The authors can elaborate more on why certain therapies have inconsistent efficacies among SI-ALI patients.
